# Supplementary material for: The Long Noncoding RNA Transcriptome of Dictyostelium discoideum Development
Source: PubMed Central journal article supplement (PMC5295588; doi:10.1534/g3.116.037150), 2016-12-06

**Supplemental Figure 2.**

**Ribosomal RNA depletion leads to >**

**20-fold enrichment of non-rRNA**

**sequencing coverage.** The fraction

(%) of non-rRNA compared to total

RNA (y-axis) is plotted as a function of

enrichment (x-axis). Enrichment of

non-rRNA transcripts was calculated as

the fold-increase from 2% pre-

treatment to Y% post-treatment,

assuming that rRNA constitutes 98% of the total cellular RNA. The different

experimental treatments are indicated in the legend, with fold enrichment in

parentheses.

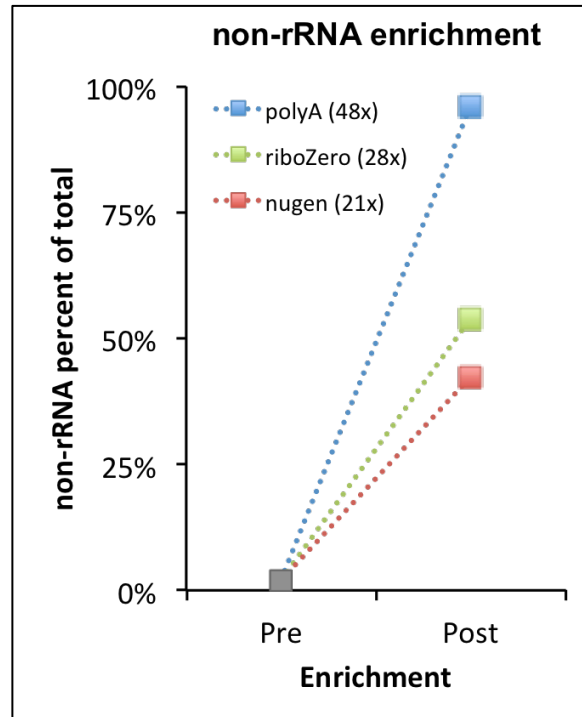

Supplement: 387FigureS2.pdf [file 387FigureS2.pdf]
