# Supplementary material for: The Long Noncoding RNA Transcriptome of Dictyostelium discoideum Development
Source: PubMed Central journal article supplement (PMC5295588; doi:10.1534/g3.116.037150), 2016-12-06
Supplement: 387FigureS5.pdf [file 387FigureS5.pdf]

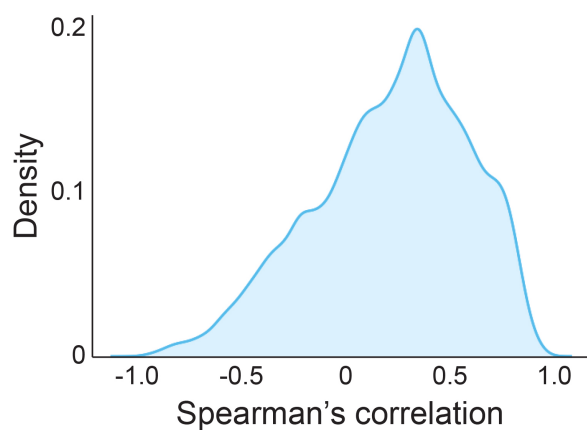

**Supplemental Figure 5. Spearman's correlation distribution of asRNA transcript model expression with their sense strand cognates.** The median correlation in temporal expression profile between asRNA model and sense-strand mRNA was 0.32. Overall the distribution was shifted positive, although many uncorrelated transcripts were observed as well.
