# Supplementary material for: The Long Noncoding RNA Transcriptome of Dictyostelium discoideum Development
Source: PubMed Central journal article supplement (PMC5295588; doi:10.1534/g3.116.037150), 2016-12-06
Supplement: 387FigureS6.pdf [file 387FigureS6.pdf]

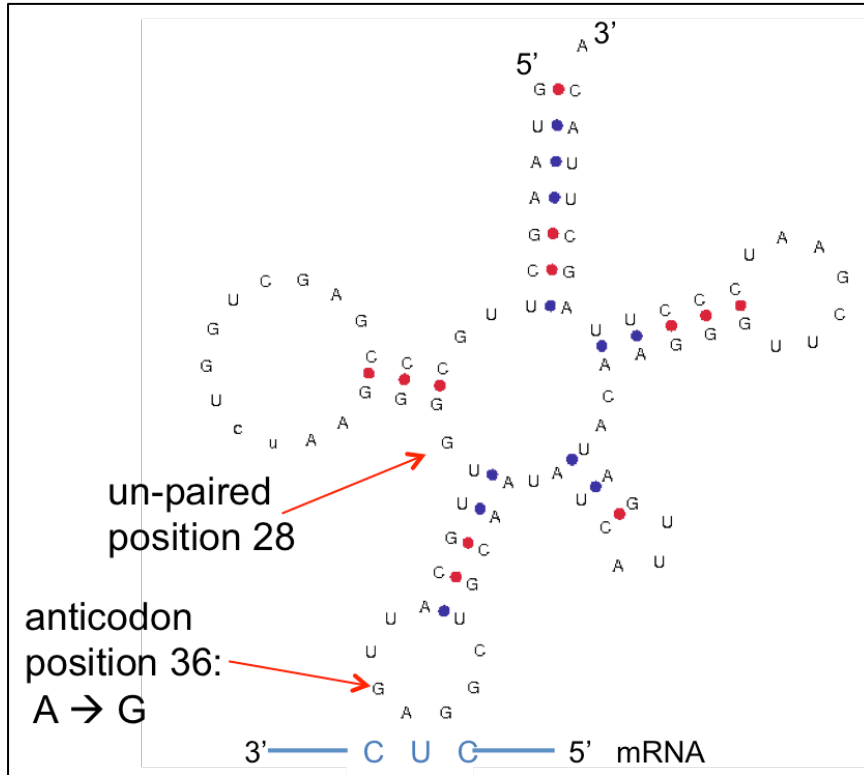

**Supplemental Figure 6. tRNA anticodon polymorphism.** Predicted tRNA structure of Leucine (CUC) variants illustrates positions of polymorphic bases (red arrows). The variable anticodon base was found at position 36, whereas position 28 does not form a complementary base pair.
