# Supplementary material for: The Long Noncoding RNA Transcriptome of Dictyostelium discoideum Development
Source: PubMed Central journal article supplement (PMC5295588; doi:10.1534/g3.116.037150), 2016-12-06
Supplement: 387FigureS7.pdf [file 387FigureS7.pdf]

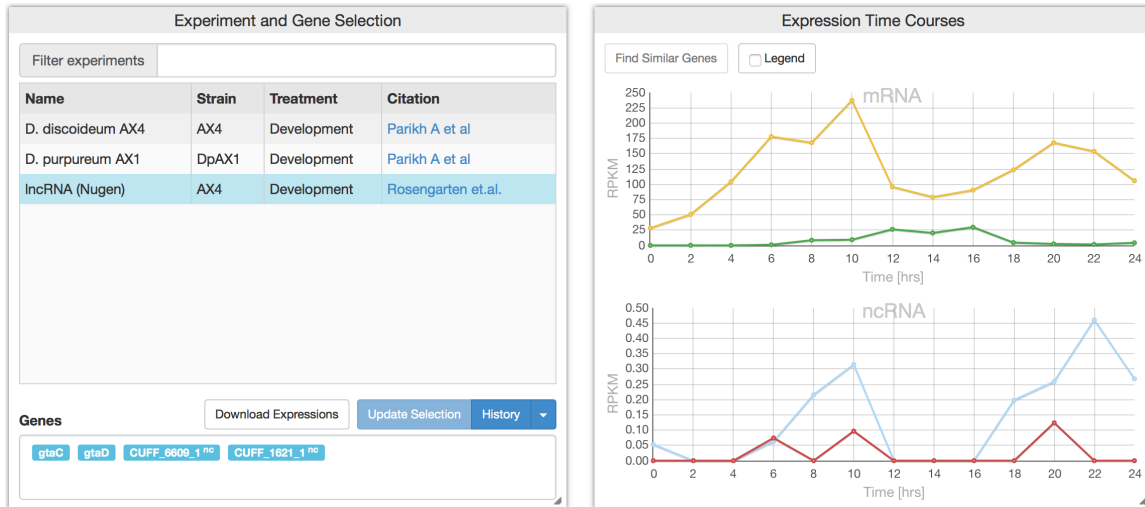

**Supplemental Figure 7. dictyExpress Time Course Expressions module displays mRNAs and lncRNAs.** Screen shot from the new dictyExpress showing the mRNA – ncRNA split screen time course module. On the left is the Experiment and Gene Selection module, with mRNAs *gtaC* and *gtaD* selected, as well as two lncRNAs identified as having similar time-course profiles. On the right is the Expression Time Courses module with new split-screen functionality to simultaneously plot mRNAs (top) and ncRNAs (bottom).
